# Supplementary material for: Over 16% efficiency organic photovoltaic cells enabled by a chlorinated acceptor with increased open-circuit voltages
Source: PubMed Central journal article supplement (PMC6555805; doi:10.1038/s41467-019-10351-5), 2019-06-07
Supplement: 41467_2019_10351_MOESM1_ESM.pdf [file 41467_2019_10351_MOESM1_ESM.pdf]

**SUPPLEMENTARY INFORMATION**

**Over 16% efficiency organic photovoltaic cells enabled by a chlorinated acceptor  
with increased open-circuit voltages**

*Yong Cui et al.*

## SUPPLEMENTARY FIGURES

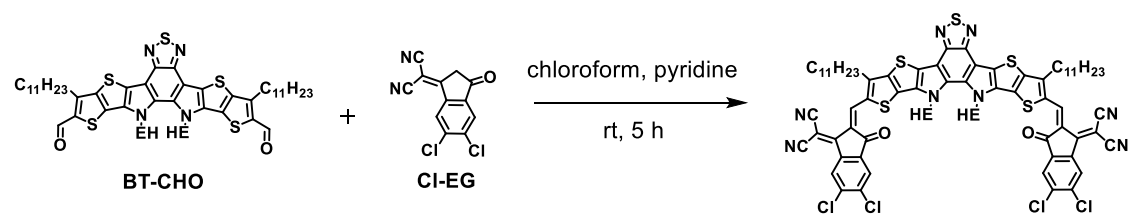

**Supplementary Figure 1.** The synthesis of BTP-4Cl.

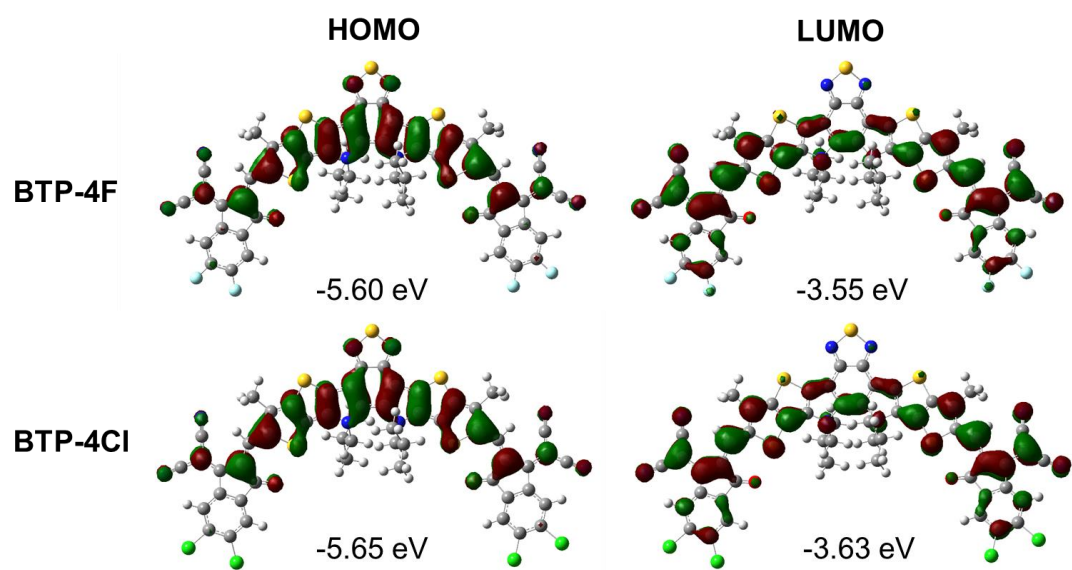

**Supplementary Figure 2.** Theoretical calculations of geometries, wavefunction distributions and molecular energy levels for the BTP-4X models.

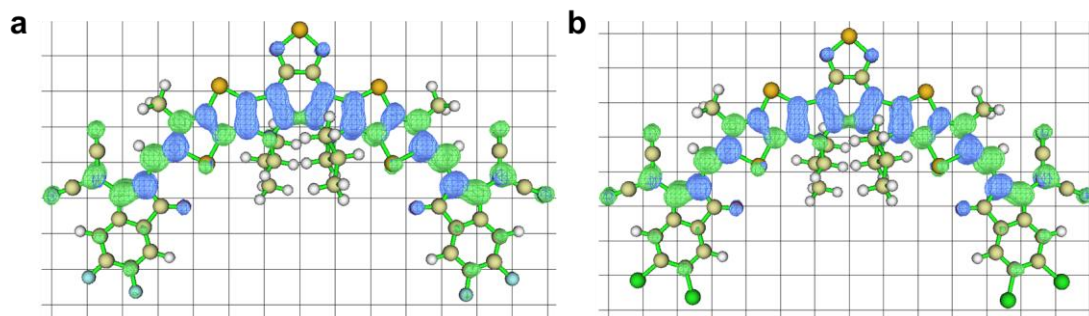

**Supplementary Figure 3.** The charge density distributions (hole, blue; electron, green) of the lowest excited states for **a.** BTP-4F, and **b.** BTP-4Cl.

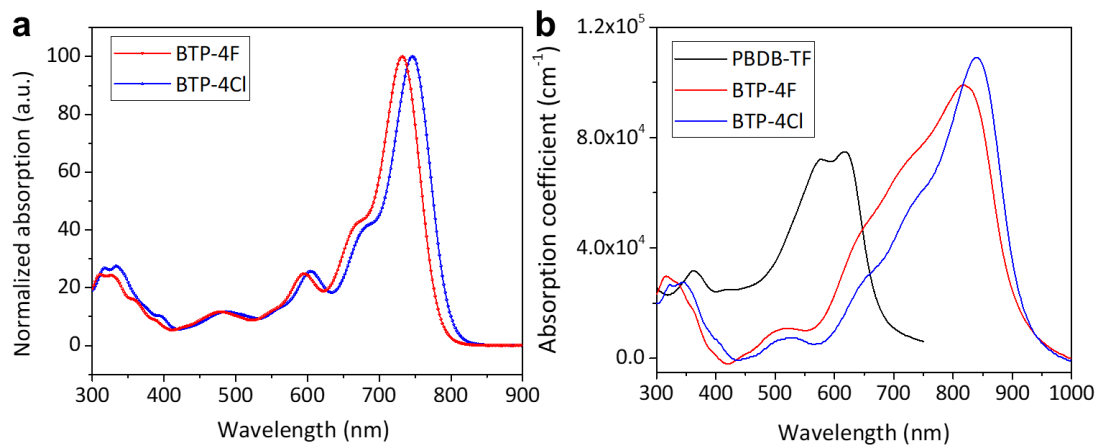

**Supplementary Figure 4. a** Normalized absorption spectra of the BTP-4X in diluted solutions. **b** Absorption coefficients of the BTP-4X films.

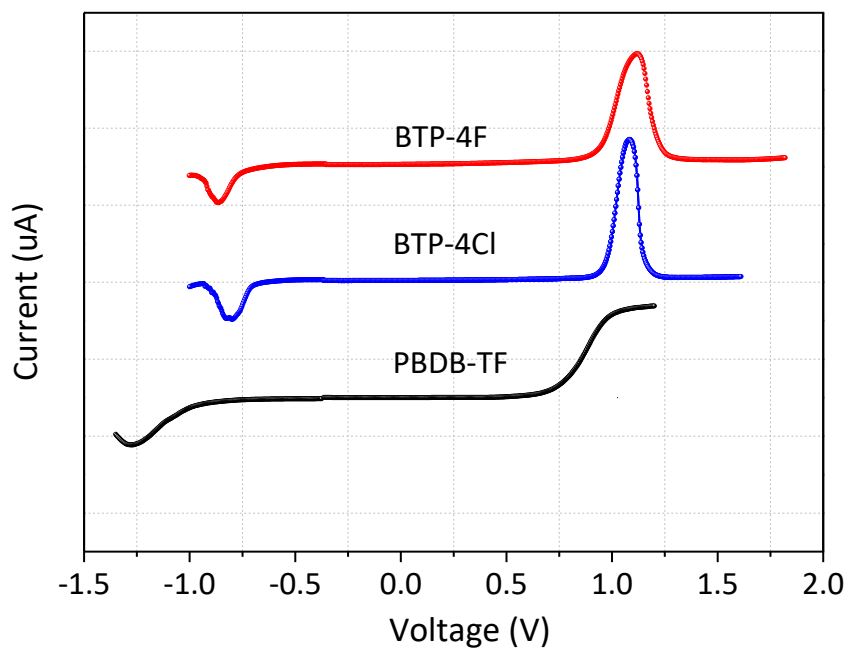

**Supplementary Figure 5.** Molecular energy levels determined by the SWV plots.

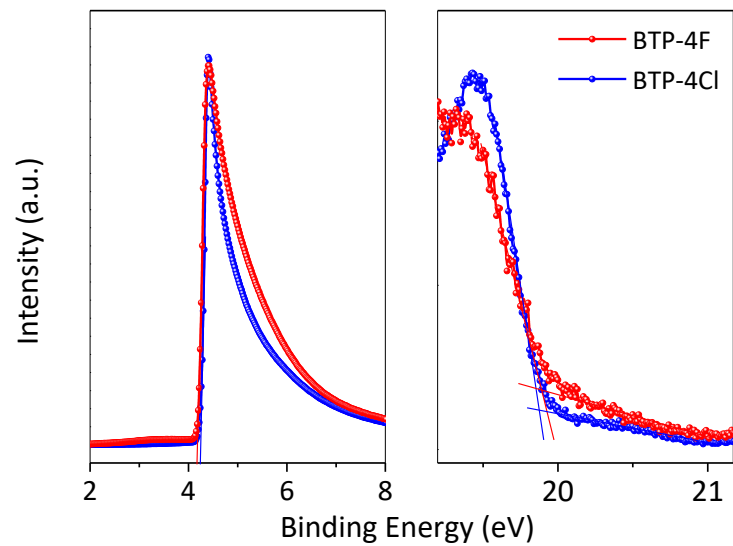

**Supplementary Figure 6.** UPS spectra of the acceptors: **a** the onset and **b** cutoff of the binding energy.

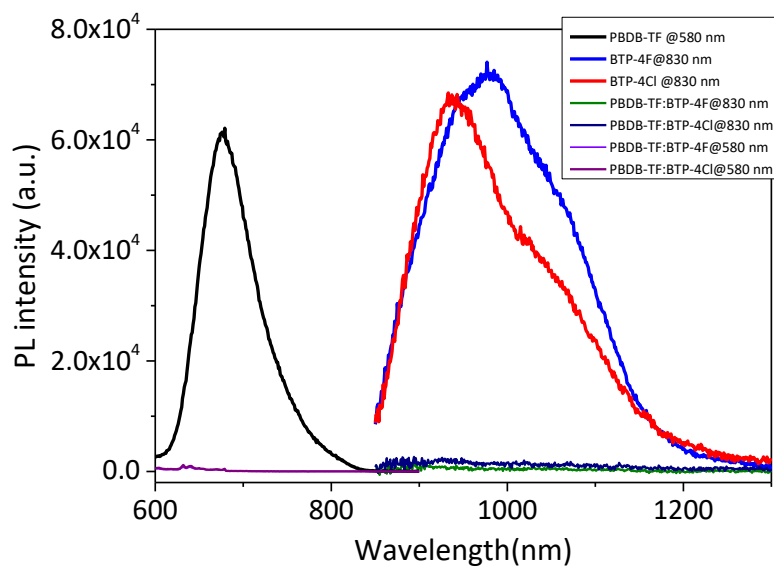

**Supplementary Figure 7.** PL spectra of the neat and blend films.



证书编号 GX1c2019-0178  
Certificate No.

测试结果  
Calibration Results

| 有效面积<br>(mm <sup>2</sup> ) | 短路电流<br>$I_{sc}$ (mA) | 开路电压<br>$V_{oc}$ (V) | 最大功率<br>$P_{max}$ (mW) |
|----------------------------|-----------------------|----------------------|------------------------|
| 9.047                      | 2.271                 | 0.837                | 1.432                  |

| 最大功率电流<br>$I_{max}$ (mA) | 最大功率电压<br>$V_{max}$ (V) | 填充因子<br>FF (%) | 转换效率(PCE)<br>$\eta$ (%) |
|--------------------------|-------------------------|----------------|-------------------------|
| 2.076                    | 0.690                   | 75.36          | 15.83                   |

注 Note:  
1. 测试所用 mask 的面积为 9.047 mm<sup>2</sup> (证书编号: CDjc 2016-3338)。  
The mask area is 9.047 mm<sup>2</sup> (Certificate No.: CDjc 2016-3338).  
2. 此数据仅对被测样品当时状态有效。  
The data apply only at the time of the test for the sample.  
(以下空白)

声明 Statement:  
1. 我院仅对加盖“中国计量科学研究院校准专用章”的完整证书负责。  
NIM is ONLY responsible for the complete certificate with the calibration stamp of NIM.  
2. 本证书的测试结果仅对所校准的计器具有有效。  
The certificate is ONLY valid for the tested instrument.  
3. 本证书用中英文两种语言表达, 准确含义以中文为准。  
The certificate is reported in both English and Chinese, with the Chinese version as standard.

测试员:  核验员: 

证书编号 GX1c2019-0179  
Certificate No.

测试结果  
Calibration Results

| 有效面积<br>(mm <sup>2</sup> ) | 短路电流<br>$I_{sc}$ (mA) | 开路电压<br>$V_{oc}$ (V) | 最大功率<br>$P_{max}$ (mW) |
|----------------------------|-----------------------|----------------------|------------------------|
| 80.688                     | 19.99                 | 0.835                | 12.17                  |

| 最大功率电流<br>$I_{max}$ (mA) | 最大功率电压<br>$V_{max}$ (V) | 填充因子<br>FF (%) | 转换效率(PCE)<br>$\eta$ (%) |
|--------------------------|-------------------------|----------------|-------------------------|
| 18.17                    | 0.670                   | 72.91          | 15.08                   |

注 Note:  
1. 测试所用 mask 的面积为 80.688 mm<sup>2</sup> (证书编号: CDjc 2016-3338)。  
The mask area is 80.688 mm<sup>2</sup> (Certificate No.: CDjc 2016-3338).  
2. 此数据仅对被测样品当时状态有效。  
The data apply only at the time of the test for the sample.  
(以下空白)

声明 Statement:  
1. 我院仅对加盖“中国计量科学研究院校准专用章”的完整证书负责。  
NIM is ONLY responsible for the complete certificate with the calibration stamp of NIM.  
2. 本证书的测试结果仅对所校准的计器具有有效。  
The certificate is ONLY valid for the tested instrument.  
3. 本证书用中英文两种语言表达, 准确含义以中文为准。  
The certificate is reported in both English and Chinese, with the Chinese version as standard.

测试员:  核验员: 

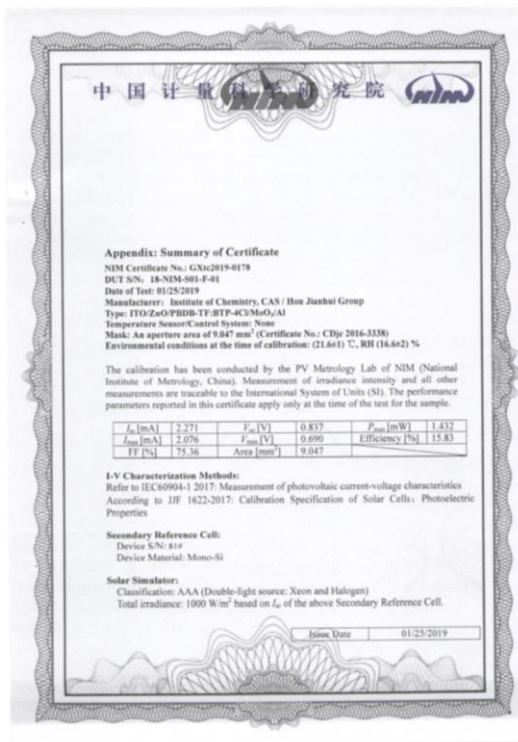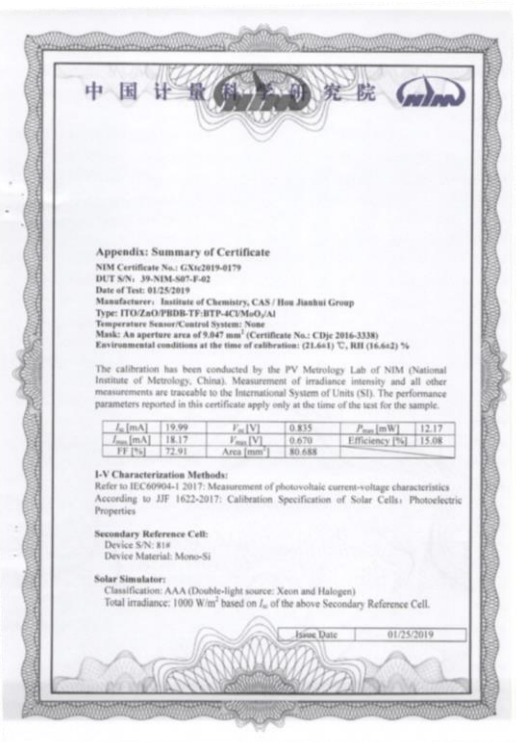

Supplementary Figure 8. Certification of the photovoltaic efficiency of the devices.

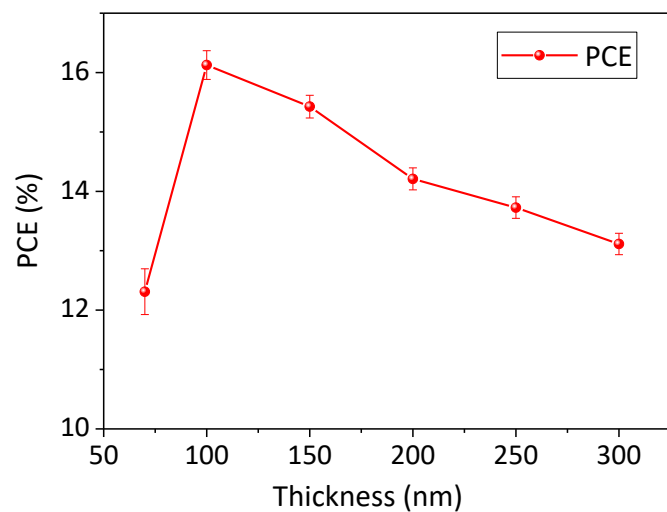

**Supplementary Figure 9.** PCEs of PBDB-TF:BTP-4Cl-based devices at varied active layer thicknesses.

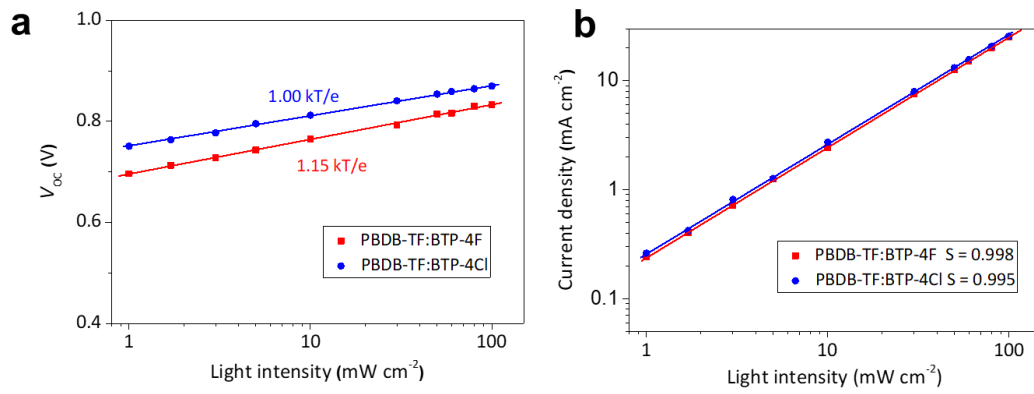

**Supplementary Figure 10.**  $V_{oc}$  and  $J_{sc}$  dependences on the light intensity.

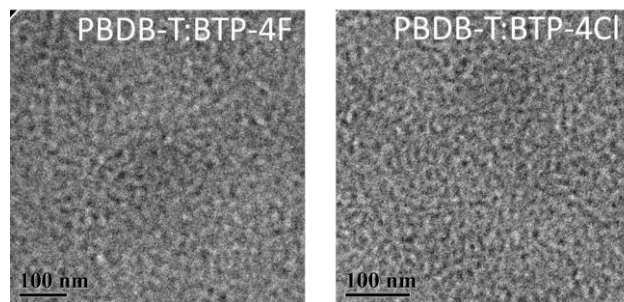

**Supplementary Figure 11.** TEM images of the blend films for PBDB-TF:BTP-4X.

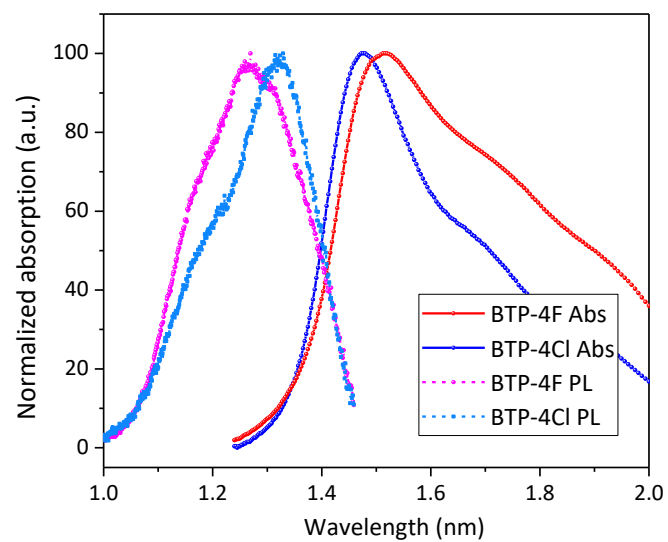

**Supplementary Figure 12.** Absorption and PL spectra of low bandgap BTP-4X acceptors.

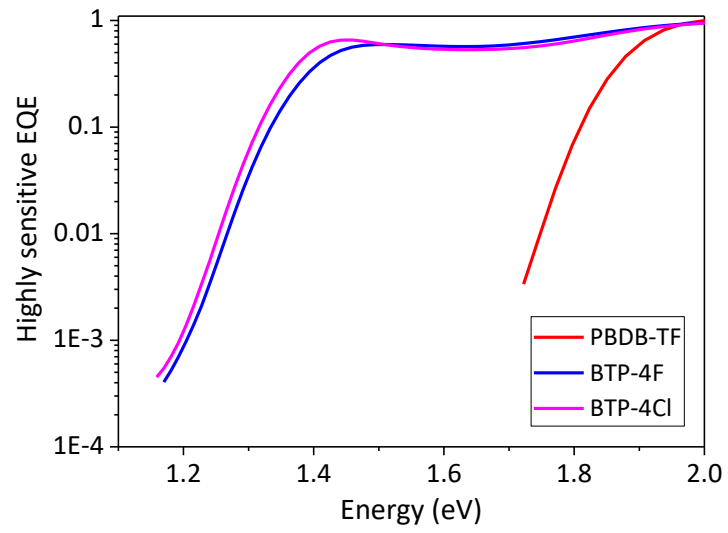

**Supplementary Figure 13.** Highly sensitive EQE curves of neat materials.

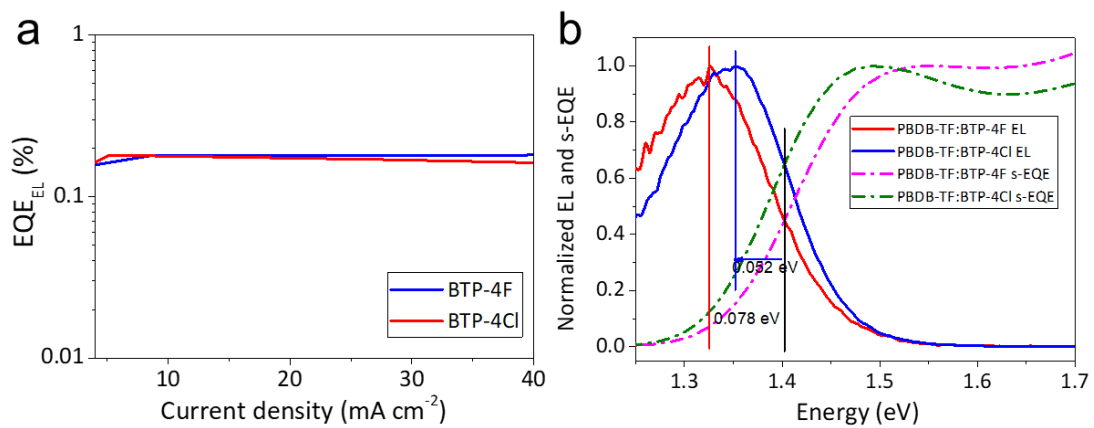

**Supplementary Figure 14. a.** EQE<sub>EL</sub> of the neat acceptor films. **b.** Normalized EL and s-EQE of the blend films.

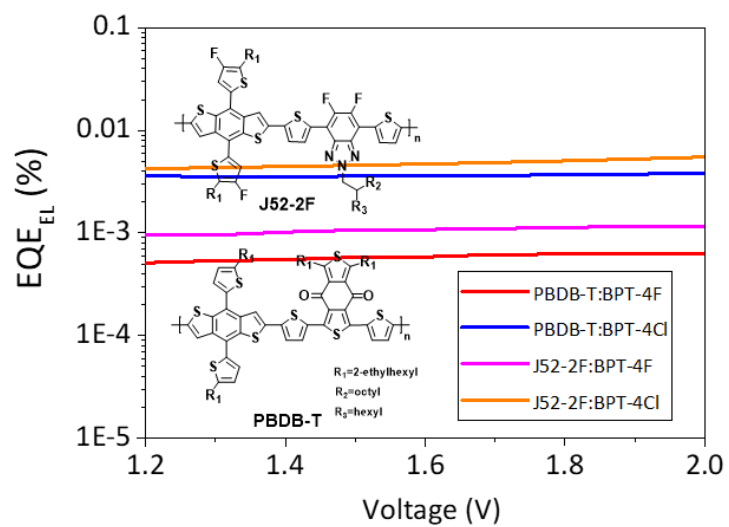

**Supplementary Figure 15.** The  $EQE_{EL}$  of the different blend combinations based on polymer donors of PBDB-T or J52-2F.



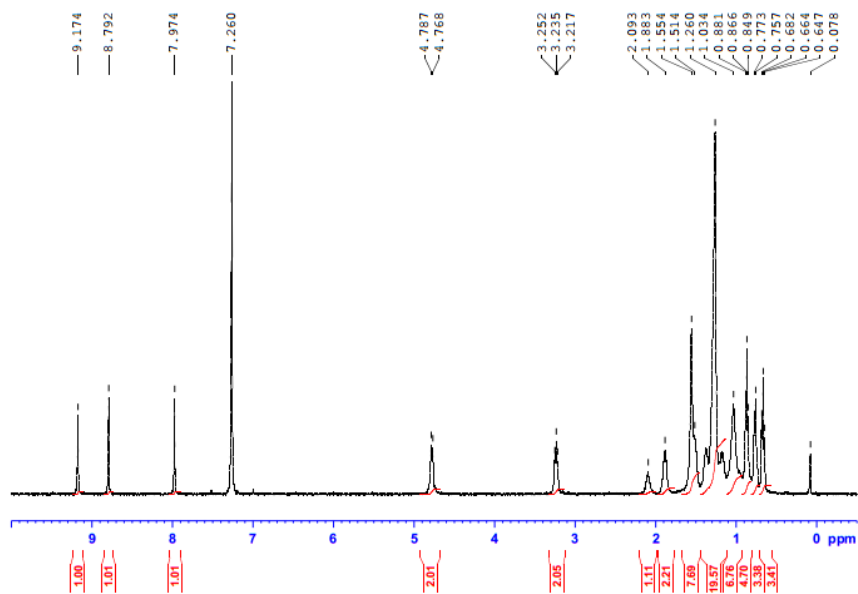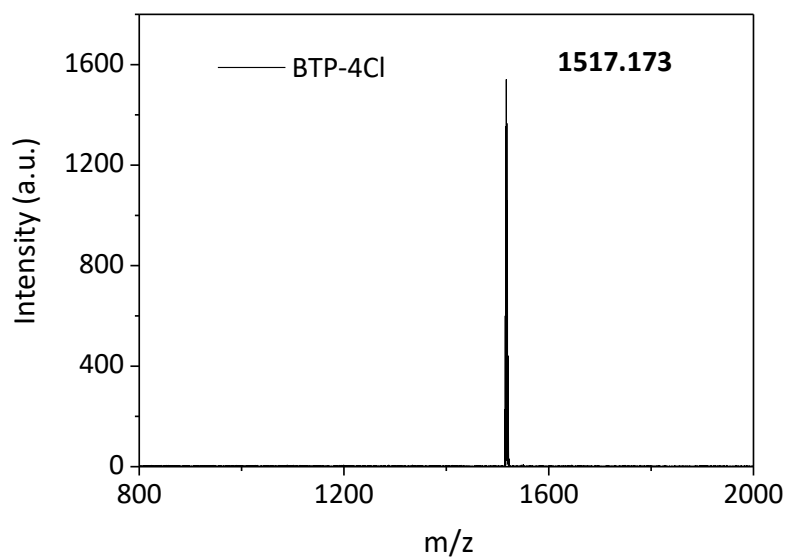

Supplementary Figure 16. <sup>1</sup>H NMR and MS-MALDI spectra of the BTP-4Cl.

## SUPPLEMENTARY TABLES

**Supplementary Table 1.** Detailed photovoltaic parameters of the PBDB-TF:BTP-4Cl-based devices processed by varied conditions.

1) To get the best D/A ratio, 0.5 v/v of CN is used as the solvent additive, the films are thermally annealed at 100 °C for 10 min.

| D/A        | $V_{OC}$ (V) | $J_{SC}$ (mA cm <sup>-2</sup> ) | FF (%) | PCE (%)           |
|------------|--------------|---------------------------------|--------|-------------------|
| 1.2:1      | 0.869        | 24.6                            | 73.8   | 15.8 (15.5 ± 0.2) |
| <b>1:1</b> | 0.864        | 25.3                            | 73.1   | 16.0 (15.7 ± 0.2) |
| 1:1.2      | 0.858        | 25.1                            | 72.2   | 15.5 (15.1 ± 0.3) |

2) To get the best CN content, the D/A ratio is kept at 1:1, and the films are thermally annealed at 100 °C for 10 min.

| CN v/v   | $V_{OC}$ (V) | $J_{SC}$ (mA cm <sup>-2</sup> ) | FF (%) | PCE (%)           |
|----------|--------------|---------------------------------|--------|-------------------|
| without  | 0.869        | 24.2                            | 0.641  | 13.5 (13.2 ± 0.2) |
| 0.5      | 0.864        | 25.3                            | 0.731  | 16.0 (15.7 ± 0.2) |
| 1        | 0.865        | 25.3                            | 0.742  | 16.2 (15.8 ± 0.2) |
| <b>2</b> | 0.867        | 25.4                            | 0.750  | 16.5 (16.1 ± 0.2) |
| 3        | 0.864        | 24.1                            | 0.752  | 15.7 (15.1 ± 0.4) |

3) The following is the optimization of the thermal annealing temperature, where D/A ratio is 1:1, CN v/v is 2%.

| Temperature  | $V_{OC}$ (V) | $J_{SC}$ (mA cm <sup>-2</sup> ) | FF (%) | PCE (%)           |
|--------------|--------------|---------------------------------|--------|-------------------|
| 80°C         | 0.870        | 25.2                            | 0.741  | 16.2 (15.9 ± 0.2) |
| <b>100°C</b> | 0.867        | 25.4                            | 0.750  | 16.5 (16.1 ± 0.2) |
| 120°C        | 0.859        | 25.5                            | 0.739  | 16.2 (15.8 ± 0.2) |
| 140°C        | 0.853        | 24.7                            | 0.728  | 15.3 (15.0 ± 0.2) |

**Supplementary Table 2.** Detailed photovoltaic parameters of the PBDB-TF:BTP-4Cl-based devices at varied active layer thicknesses.

| Thickness (nm) | $V_{oc}$ (V) | $J_{sc}$ ( $\text{mA cm}^{-2}$ ) | FF    | PCE (%)                 |
|----------------|--------------|----------------------------------|-------|-------------------------|
| $70 \pm 5$     | 0.865        | 20.7                             | 0.721 | 12.9 ( $12.3 \pm 0.4$ ) |
| $100 \pm 4$    | 0.867        | 25.4                             | 0.750 | 16.5 ( $16.1 \pm 0.2$ ) |
| $150 \pm 6$    | 0.866        | 25.6                             | 0.714 | 15.8 ( $15.4 \pm 0.2$ ) |
| $200 \pm 6$    | 0.861        | 26.1                             | 0.644 | 14.5 ( $14.2 \pm 0.2$ ) |
| $250 \pm 10$   | 0.857        | 26.7                             | 0.613 | 14.0 ( $13.7 \pm 0.2$ ) |
| $300 \pm 8$    | 0.854        | 27.2                             | 0.578 | 13.4 ( $13.1 \pm 0.2$ ) |

**Supplementary Table 3.** The charge mobilities of the blend measured by SCLC method.

| Blend           | hole mobility                                         | electron mobility                                     | $\mu_h/\mu_e$ |
|-----------------|-------------------------------------------------------|-------------------------------------------------------|---------------|
|                 | $\mu_h$ ( $\text{cm}^2 \text{V}^{-1} \text{s}^{-1}$ ) | $\mu_e$ ( $\text{cm}^2 \text{V}^{-1} \text{s}^{-1}$ ) |               |
| PBDB-TF:BTP-4F  | $1.25 \times 10^{-4}$                                 | $7.33 \times 10^{-5}$                                 | 1.7           |
| PBDB-TF:BTP-4Cl | $2.12 \times 10^{-4}$                                 | $1.58 \times 10^{-4}$                                 | 1.3           |

**Supplementary Table 4.** The coherence length (CL) of (010) peaks for the films.

| Materials        | (010) Peak position ( $\text{\AA}^{-1}$ ) | (010) FWHM | (010) CL (nm) |
|------------------|-------------------------------------------|------------|---------------|
| BTP-4F           | 1.75                                      | 0.28       | 2.02          |
| BTP-4Cl          | 1.75                                      | 0.27       | 2.09          |
| PBDB-TF: BTP-4F  | 1.75                                      | 0.28       | 2.02          |
| PBDB-TF: BTP-4Cl | 1.75                                      | 0.28       | 2.02          |

**Supplementary Table 5.** Detailed photovoltaic parameters of the devices based on different polymer donors (PBDB-T and J52-2F) and BTP-4X acceptors.

| Devices        | $V_{oc}$ (V) | $J_{sc}$<br>( $\text{mA cm}^{-2}$ ) | FF    | PCE (%)                 | $\Delta E_3$ (eV) |
|----------------|--------------|-------------------------------------|-------|-------------------------|-------------------|
| J52-2F:BTP-4F  | 0.770        | 25.4                                | 0.679 | 13.3 ( $13.0 \pm 0.2$ ) | 0.294             |
| J52-2F:BTP-4Cl | 0.797        | 25.8                                | 0.700 | 14.4 ( $14.1 \pm 0.2$ ) | 0.254             |
| PBDB-T:BTP-4F  | 0.711        | 25.1                                | 0.626 | 11.2 ( $10.8 \pm 0.2$ ) | 0.318             |
| PBDB-T:BTP-4Cl | 0.774        | 25.5                                | 0.609 | 12.0 ( $11.6 \pm 0.3$ ) | 0.265             |

### **Supplementary Method.**

**Material.** The core unit of BT-CHO was synthesized by referencing the reported literature.<sup>1,2</sup> The electron-accepting unit was synthesized in our previous work.<sup>3,4</sup> Other reagents and solvents used were purchased from commercial sources and used as received.

### **Synthesis of the BTP-4Cl.**

The core compound BT-CHO (205 mg, 0.2 mmol) and the electron-accepting unit (263 mg, 1 mmol) were added to the chloroform (15 mL) under the protection of argon. Then, 0.5 mL of pyridine was added slowly. The reaction was stirred for 5 hours at room temperature. The mixture was purified by silica gel column chromatography using chloroform as the eluent. 225 mg of black solid was obtained as the product (yield 74%). MS (MALDI) *m/z*: Calcd for C<sub>82</sub>H<sub>86</sub>Cl<sub>4</sub>N<sub>8</sub>O<sub>2</sub>S<sub>5</sub>: 1517.424; Found 1517.173. Analytical calculation for C<sub>82</sub>H<sub>86</sub>Cl<sub>4</sub>N<sub>8</sub>O<sub>2</sub>S<sub>5</sub>: C, 64.89; H, 5.71; N, 7.38. Experimental result: C, 64.55; H, 5.99; N, 6.97. The <sup>1</sup>H NMR and MS spectra are provided as **Supplementary Figure 16**. As BTP-4Cl has a limited solubility in chloroform, it's hard to get clear <sup>13</sup>C NMR spectrum, therefore we don't provide it here.

### Supplementary Reference

- 1 Yuan, J. *et al.* Single-Junction Organic Solar Cell with over 15% Efficiency Using Fused-Ring Acceptor with Electron-Deficient Core. *Joule* **3**, 1140-1151 (2019).
- 2 Cheng, Y.-J. *et al.* Synthesis, Photophysical and Photovoltaic Properties of Conjugated Polymers Containing Fused Donor–Acceptor Dithienopyrrolobenzothiadiazole and Dithienopyrroloquinoxaline Arenes. *Macromolecules* **45**, 2690-2698 (2012).
- 3 Zhang, H. *et al.* Over 14% Efficiency in Organic Solar Cells Enabled by Chlorinated Nonfullerene Small-Molecule Acceptors. *Adv. Mater.* **30**, e1800613 (2018).
- 4 Cui, Y. *et al.* Efficient Semitransparent Organic Solar Cells with Tunable Color enabled by an Ultralow-Bandgap Nonfullerene Acceptor. *Adv. Mater.* **29**, 1703080 (2017).
