# Supplementary material for: Over 16% efficiency organic photovoltaic cells enabled by a chlorinated acceptor with increased open-circuit voltages
Source: PubMed Central journal article supplement (PMC6555805; doi:10.1038/s41467-019-10351-5), 2019-06-07
Supplement: 41467_2019_10351_MOESM2_ESM.pdf [file 41467_2019_10351_MOESM2_ESM.pdf]

## Solar Cells Reporting Summary

Nature Research wishes to improve the reproducibility of the work that we publish. This form is intended for publication with all accepted papers reporting the characterization of photovoltaic devices and provides structure for consistency and transparency in reporting. Some list items might not apply to an individual manuscript, but all fields must be completed for clarity.

For further information on Nature Research policies, including our [data availability policy](#), see [Authors & Referees](#).

### ► Experimental design

#### Please check: are the following details reported in the manuscript?

##### 1. Dimensions

- Area of the tested solar cells  Yes  No Area of the tested solar cells is provided in methods, section "Fabrication and measurement of OPV cell"
- Method used to determine the device area  Yes  No The method is provided in methods, section "Fabrication and measurement of OPV cell"
- Explain why this information is not reported/not relevant.*

##### 2. Current-voltage characterization

- Current density-voltage (J-V) plots in both forward and backward direction  Yes  No State where this information can be found in the text.  
Just J-V plot in forward direction since there is no hysteresis in organic solar cell.
- Voltage scan conditions  Yes  No The scan conditions are provided in methods, section "Fabrication and measurement of OPV cell"
- For instance: scan direction, speed, dwell times*
- Explain why this information is not reported/not relevant.*
- Test environment  Yes  No Test environment is provided in methods, section "Fabrication and measurement of OPV cell"
- For instance: characterization temperature, in air or in glove box*
- Explain why this information is not reported/not relevant.*
- Protocol for preconditioning of the device before its characterization  Yes  No State where this information can be found in the text.  
No preconditioning protocol.
- Stability of the J-V characteristic  Yes  No State where this information can be found in the text.  
there is no corresponding testing equipment
- Verified with time evolution of the maximum power point or with the photocurrent at maximum power point; see ref. 7 for details.*

##### 3. Hysteresis or any other unusual behaviour

- Description of the unusual behaviour observed during the characterization  Yes  No State where this information can be found in the text.  
No. In general, organic solar cells do not have hysteresis problems.
- Related experimental data  Yes  No State where this information can be found in the text.  
NO.

##### 4. Efficiency

- External quantum efficiency (EQE) or incident photons to current efficiency (IPCE)  Yes  No EQE curve is shown in Figure 2d  
*Explain why this information is not reported/not relevant.*
- A comparison between the integrated response under the standard reference spectrum and the response measure under the simulator  Yes  No State where this information can be found in the text.  
NO
- For tandem solar cells, the bias illumination and bias voltage used for each subcell  Yes  No State where this information can be found in the text.  
Our cells were only fabricated for single solar cells.

## 5. Calibration

Light source and reference cell or sensor used for the characterization

- Yes  
 No

Relative information is provided in methods, section "Fabrication and measurement of OPV cell"

*Explain why this information is not reported/not relevant.*

Confirmation that the reference cell was calibrated and certified

- Yes  
 No

Relative information is provided in methods, section "Fabrication and measurement of OPV cell"

*Explain why this information is not reported/not relevant.*

Calculation of spectral mismatch between the reference cell and the devices under test

- Yes  
 No

*State where this information can be found in the text.*

The spectral mismatch factor was determined at National Institute of Metrology, China (NIM). We do not have the detailed information for the method.

## 6. Mask/aperture

Size of the mask/aperture used during testing

- Yes  
 No

Size of the mask is provided in methods, section "Fabrication and measurement of OPV cell"

*Explain why this information is not reported/not relevant.*

Variation of the measured short-circuit current density with the mask/aperture area

- Yes  
 No

Information is provided in table 2.

*Explain why this information is not reported/not relevant.*

## 7. Performance certification

Identity of the independent certification laboratory that confirmed the photovoltaic performance

- Yes  
 No

Certified results are provided in the figure 2c.

*Explain why this information is not reported/not relevant.*

A copy of any certificate(s)  
*Provide in Supplementary Information*

- Yes  
 No

certificates are provided in the supplementary information.

*Explain why this information is not reported/not relevant.*

## 8. Statistics

Number of solar cells tested

- Yes  
 No

Number of cells tested is provided in Table 1.

*Explain why this information is not reported/not relevant.*

Statistical analysis of the device performance

- Yes  
 No

Statistical results of the devices are listed in Table 1.

*Explain why this information is not reported/not relevant.*

## 9. Long-term stability analysis

Type of analysis, bias conditions and environmental conditions

- Yes  
 No

*State where this information can be found in the text.*

NO

*For instance: illumination type, temperature, atmosphere humidity, encapsulation method, preconditioning temperature*
